# Supplementary material
Source: PubMed Central journal article supplement (PMC2151790)
Supplement: bjpg57-741TableS1.pdf [file bjpg57-741TableS1.pdf]

Supplementary Table 1. Quality of reporting of meta-analysis.

| Heading      | Sub-heading                 | Descriptor                                                                                                                                                                                                                                                                                                                            | Reported?<br>(Y/N) | Page<br>number           |
|--------------|-----------------------------|---------------------------------------------------------------------------------------------------------------------------------------------------------------------------------------------------------------------------------------------------------------------------------------------------------------------------------------|--------------------|--------------------------|
| Title        |                             | Identify the report as a meta-analysis (or systematic) review                                                                                                                                                                                                                                                                         | Y                  | 741                      |
| Abstract     |                             | Use a structured format                                                                                                                                                                                                                                                                                                               | Y                  | 741                      |
|              |                             | <b>Describe</b>                                                                                                                                                                                                                                                                                                                       |                    |                          |
|              | Objectives                  | The clinical question explicitly                                                                                                                                                                                                                                                                                                      | Y                  | 741                      |
|              | Data sources                | The databases (such as, a list) and other information sources                                                                                                                                                                                                                                                                         | Y                  | 741                      |
|              | Review methods              | The selection criteria (such as, population, intervention, outcome, and study design); methods for validity assessment, data abstraction, and study characteristics, and quantitative data synthesis in sufficient detail to permit replication                                                                                       | Y                  | 741                      |
|              | Results                     | Characteristics of the randomised controlled trials included and excluded; qualitative and quantitative findings (such as, point estimates and confidence intervals); and subgroup analyses                                                                                                                                           | Y                  | 741                      |
|              |                             | The main results                                                                                                                                                                                                                                                                                                                      |                    |                          |
|              |                             | <b>Describe</b>                                                                                                                                                                                                                                                                                                                       |                    |                          |
| Introduction |                             | The explicit clinical problem, biological rationale for the intervention, and rationale for review                                                                                                                                                                                                                                    | Y                  | 741–742                  |
| Methods      | Searching                   | The information sources, in detail (for example, databases, registers, personal files, expert informants, agencies, hand-searching), and any restrictions (years considered), publication status, language of publication)                                                                                                            | Y                  | 742                      |
|              | Selection                   | The inclusion and exclusion criteria (defining population, intervention, principal outcomes, and study design)                                                                                                                                                                                                                        | Y                  | 742                      |
|              | Validity assessment         | The criteria and process used (for example, masked conditions, quality assessment, and their findings)                                                                                                                                                                                                                                | Y                  | 742                      |
|              | Data abstraction            | The process or processes used (for example, completed independently, in duplicate)                                                                                                                                                                                                                                                    | Y                  | 742                      |
|              | Study characteristics       | The type of study design, participants' characteristics, details of intervention, outcome definitions, and how clinical heterogeneity was assessed                                                                                                                                                                                    | Y                  | 742                      |
|              | Quantitative data synthesis | The principal measures of effect (for example, relative risk), method of combining results (statistical testing and confidence intervals), handling of missing data; how statistical heterogeneity was assessed; a rationale for any a priori sensitivity and subgroup analyses; and any assessment of publication bias               | Y                  | 742                      |
| Results      | Trial flow                  | Provide a meta-analysis profile summarising trial flow                                                                                                                                                                                                                                                                                | Y                  | Supp. Fig 1 <sup>a</sup> |
|              | Study characteristics       | Present descriptive data for each trial (for example age, sample size, intervention, dose, duration, follow-up period)                                                                                                                                                                                                                | Y                  | 745, Table 2             |
|              | Quantitative data synthesis | Report agreement on the selection and validity assessment; present simple summary results (for each treatment group in each trial, for each primary outcome); present data needed to calculate effect sizes and confidence intervals in intention-to treat analyses (for example, 2 × 2 tables of counts, means and SDs, proportions) | Y                  | 743–746                  |
| Discussion   |                             | Summarise key findings; discuss clinical inferences based on internal and external validity; interpret the results in light of the totality of available evidence; describe potential biases in the review process (for example, publication bias); and suggest a future research agenda                                              | Y                  | 746–747                  |

<sup>a</sup>See Supplementary Figure 1.
