# Supplementary material
Source: PubMed Central journal article supplement (PMC2151790)
Supplement: bjpg57-741TableS2.pdf [file bjpg57-741TableS2.pdf]

**Supplementary Table 2. Questionnaire scales items.**

| PSOC <sup>11</sup>                         | van Uden <sup>19</sup>                                                | SQOC <sup>7</sup>                | Moll van Charante <sup>5</sup>                           |
|--------------------------------------------|-----------------------------------------------------------------------|----------------------------------|----------------------------------------------------------|
| <b>Communication and management</b>        | <b>Accessibility by phone</b> <sup>tel, gp, home</sup>                | Getting through on the telephone | <b>Telephone nurse</b> <sup>tel, gp, home</sup>          |
| Satisfied with doctor's explanation        | Ease of finding phone number <sup>not home visit</sup>                | Way initial call was handled     | Professionalism                                          |
| Doctor's advice about getting more help    | Easy to get through                                                   | Time to wait                     | Clear explanation                                        |
| Better understanding of problem            | Time to answer phone                                                  | Manner of doctor or nurse        | Confidence                                               |
| More explanation from the doctor           | <b>Doctor's assistants attitude</b> <sup>tel, gp, home</sup>          | Explanation                      | Friendliness                                             |
| Doctor's recommendation made be better     | Friendliness on phone                                                 | Treatment or advice              | Understanding my problem                                 |
| Felt better after talking with doctor      | Enough time to talk on phone                                          | Overall satisfaction             | Taking time to talk                                      |
| Follow doctor's advice                     | Understood my problem                                                 |                                  | Taking me seriously                                      |
|                                            | Took my problem seriously                                             |                                  | Advice helped me <sup>tel only</sup>                     |
|                                            | Information was clear                                                 |                                  | Reassurance <sup>tel only</sup>                          |
| <b>Doctor's attitude</b>                   |                                                                       |                                  | Advice or treatment <sup>tel only</sup>                  |
| Doctor reluctant to visit                  | <b>Questions asked by doctor's assistant</b> <sup>tel, gp, home</sup> |                                  | Feasibility of advice <sup>tel only</sup>                |
| Doctor examined more carefully             | Asked too many questions                                              |                                  | <b>Doctor</b> <sup>gp, home</sup>                        |
| Doctor made me feel guilty                 | Annoyance at not starting with problem                                |                                  | Advice/treatment helped me                               |
| Felt that I wasted doctor's time           |                                                                       |                                  | Advice or treatment                                      |
| The doctor was rushed                      | <b>Urgency of complaint</b> <sup>tel, gp, home</sup>                  |                                  | Reassurance                                              |
|                                            | I believed my problem was very severe                                 |                                  | Feasibility of advice/treatment                          |
|                                            | My problem needed immediate care                                      |                                  | Confidence                                               |
| <b>Continuity of care</b>                  |                                                                       |                                  | Clear explanation                                        |
| Happy to see any doctor                    | <b>Advice given by doctors assistant</b> <sup>tel</sup>               |                                  | Taking time to talk                                      |
| No need to see own doctor                  | Information about my problem was good                                 |                                  | Careful physical examination                             |
| Preferred to see own doctor                | Advice was very useful                                                |                                  | Friendliness                                             |
| Generally no need to see own doctor        | Advice reassured me                                                   |                                  | Professionalism                                          |
|                                            | Advice was sufficient                                                 |                                  | Understanding my problem                                 |
| <b>Delay until visit</b>                   | Assistant was right to give me advice only                            |                                  | Taking me seriously                                      |
| Uncertain about waiting time               | <b>Waiting time at the cooperative</b> <sup>gp</sup>                  |                                  | <b>Organisation</b> <sup>tel, gp, home</sup>             |
| Preferred doctor to arrive sooner          | Had too long to wait at registration                                  |                                  | General information on cooperative                       |
| Worried because the doctor was late        | Had too long to wait before seeing doctor                             |                                  | Accessibility pharmacy                                   |
|                                            |                                                                       |                                  | Accessibility by telephone                               |
| <b>Access to out-of-hours care</b>         | <b>Waiting room</b> <sup>gp</sup>                                     |                                  | Furnishings of waiting room <sup>gp only</sup>           |
| Difficult to get through on telephone      | There was enough material to entertain                                |                                  | Tidiness and hygiene <sup>gp only</sup>                  |
| Contact arrangement could be better        | The room was very clean                                               |                                  | Time in waiting room <sup>gp only</sup>                  |
| No problems with contact                   | <b>Distance to the GP cooperative</b> <sup>gp</sup>                   |                                  | Parking facilities <sup>gp only</sup>                    |
|                                            | Travel time too long                                                  |                                  | Accessibility of the building <sup>gp only</sup>         |
| <b>Initial contact person</b>              | GP cooperative is easily accessible                                   |                                  | Time between contact and consultation <sup>gp only</sup> |
| Got necessary advice from initial contact  | <b>Treatment by the GP</b> <sup>gp, home</sup>                        |                                  | Signposting to the GP cooperative <sup>gp only</sup>     |
| Initial contact understood the problem     | GP took my problem seriously                                          |                                  | Time between contact and home visit <sup>home only</sup> |
|                                            | GP was friendly                                                       |                                  |                                                          |
| <b>Telephone advice</b>                    | GP gave me clear information                                          |                                  |                                                          |
| Easy to get advice from the doctor         | GP gave me useful advice                                              |                                  |                                                          |
| Would prefer a visit from the doctor       | GP had enough time for me                                             |                                  |                                                          |
| Doctor right to give telephone advice      | I was very pleased with my treatment                                  |                                  |                                                          |
| Little unhappy with telephone advice       | <b>Waiting time until GP arrives</b> <sup>home</sup>                  |                                  |                                                          |
|                                            | It took too long for the GP to arrive                                 |                                  |                                                          |
| <b>Overall satisfaction</b>                | <b>Overall satisfaction</b> <sup>tel, gp, home</sup>                  |                                  |                                                          |
| Prefer to see a different doctor next time | Contact with the GP cooperative                                       |                                  |                                                          |
| Overall delighted with care received       | Time it took to help me                                               |                                  |                                                          |
| Little unhappy with care received          | GP cooperative functions very well                                    |                                  |                                                          |
| Perfect out-of-hours service               | Functioning of GP cooperative                                         |                                  |                                                          |
|                                            | Telephone procedure at cooperative <sup>not gp</sup>                  |                                  |                                                          |

<sup>tel</sup>scale used for patients receiving telephone advice. <sup>gp</sup>scale used for patients attending a consultation at the GP cooperative. <sup>home</sup>scale used for patients receiving a home visit. <sup>not home</sup>item not used in the scale for patients receiving a home visit. <sup>not gp</sup>item not used in the scale for patients attending a consultation at the GP cooperative. <sup>tel only</sup>items that are only within the telephone advice version of the questionnaire. <sup>gp only</sup>items that are only within the centre consultation version of the questionnaire. <sup>home only</sup>items that are only within the home visit version of the questionnaire.
